# Supplementary material
Source: ML conference proceedings conference paper supplement (https://proceedings.neurips.cc/paper_files/paper/2017/hash/d8d31bd778da8bdd536187c36e48892b-Abstract.html)
Supplement: Supplementary file [file d8d31bd778da8bdd536187c36e48892b-Supplemental.zip]

---

# Supplementary Material for Approximation Bounds for Hierarchical Clustering: Average Linkage, Bisecting K-means, and Local Search

---

**Benjamin Moseley\***  
Carnegie Mellon University  
Pittsburgh, PA 15213, USA  
moseleyb@andrew.cmu.edu

**Joshua R. Wang†**  
Department of Computer Science Stanford University  
353 Serra Mall, Stanford, CA 94305, USA  
joshua.wang@cs.stanford.edu

## 1 A Lower Bound on Average-Linkage-Clustering

This section is devoted to proving the following Lemma 3.2, a lower bound on the performance of average linkage clustering.

**Proof (of Lemma 3.2):** Our strategy is to trick Average Linkage into collapsing the entire graph into a star graph, while the optimum hierarchical clustering treats the graph as multiple disjoint star graphs. As a warm-up, consider the following graph, depicted in Figure 1. The graph has two special nodes,  $u$  and  $v$ . There is an edge between  $u$  and  $v$  of weight  $w_{uv} = 1 + \delta$  for some small  $\delta > 0$ . There are also unit weight edges between  $u$  and  $\frac{n}{2} - 1$  other nodes, and unit weight edges between  $v$  and the remaining  $\frac{n}{2} - 1$  nodes.

If this is  $G$ , then Average Linkage will first merge  $u$  and  $v$  together, scoring a revenue gain of  $(1 + \delta)(n - 2) = O(n)$ . After this first merge, all nodes appear identical and it does not matter what order they are merged into cluster  $\{u, v\}$ . Average Linkage will score an additional revenue gain of  $(n - 3) + (n - 4) + \dots + 1 \leq \frac{1}{2}n^2$ . Meanwhile, the optimal clustering may merge  $u$  with its other neighbors first and  $v$  with its other neighbors first, scoring a revenue gain of  $2[(n - 2) + (n - 3) + \dots + (n/2)] = \frac{3}{4}n^2 - O(n)$ . Since Average Linkage has a final revenue of  $\frac{1}{2}n^2 + O(n)$  while OPT has a final revenue of  $\frac{3}{4}n^2 - O(n)$ , as  $n$  grows the approximation ratio approaches  $\frac{2}{3}$  from above.

We then improve the ratio to  $\frac{1}{2}$  considering a clique on  $k$  vertices instead of just  $u$  and  $v$ , and giving each node a neighborhood of  $n/k - 1$  other vertices. The general graph is depicted in Figure 1.

In the remaining analysis, we treat  $k$  as a constant that is hidden by big-O notation. Average Linkage still greedily merges the clique first, scoring a total revenue gain of:

$$(1 + \delta)[(1)(n - 2) + (2)(n - 3) + \dots + (k - 1)(n - k)] \leq n \frac{k^2}{2} = O(n)$$

However, after merging the clique, Average Linkage is in the same situation as before and can only score  $\frac{1}{2}n^2$  additional revenue.

---

\*Benjamin Moseley was supported in part by a Google Research Award, a Yahoo Research Award and NSF Grants CCF-1617724, CCF-1733873 and CCF-1725661. This work was partially done while the author was working at Washington University in St. Louis.

†Joshua R. Wang was supported in part by NSF Grant CCF-1524062.

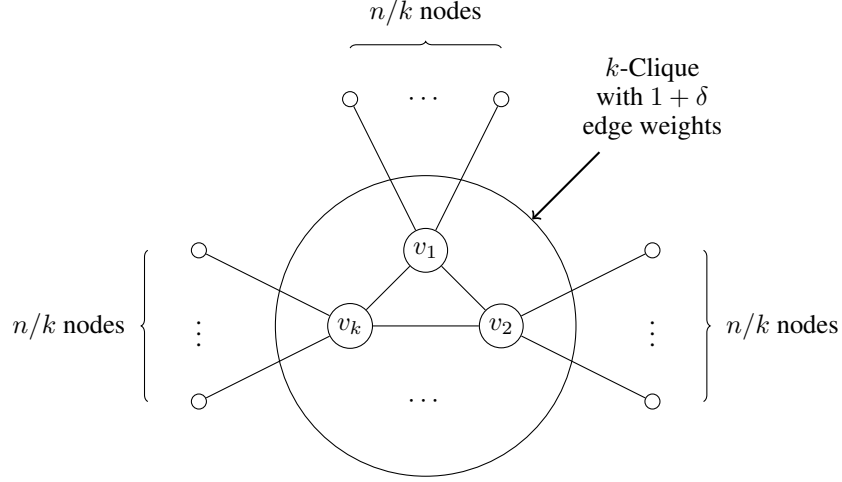

Figure 1: Hard graph for Average Linkage (general  $k$  case).

In this modified graph, the optimal hierarchical clustering can merge each clique node with its  $\frac{n}{k} - 1$  neighbors before merging the clique nodes with each other. However, doing so means that:

$$\begin{aligned}
 \text{rev}_G(T^*) &\geq k \left[ (n-2) + (n-3) + \dots + \left( \frac{k-1}{k}n \right) \right] \\
 &= \frac{k}{2} \left( \frac{2k-1}{k}n - 2 \right) \left( \frac{n}{k} - 1 \right) \\
 &= \left( \frac{2k-1}{2k} \right) n^2 - O(n)
 \end{aligned}$$

Following the same analysis as the previous example, our approximation will approach  $\frac{1}{2}$  as  $k$  grows to infinity. This completes the proof.  $\blacksquare$

## 2 Random Hierarchical Clustering

In this section, we bound the performance of a random divisive algorithm. In each step, the algorithm is given a cluster and divides the points into two clusters  $A$  and  $B$  where a point is added in each step uniformly at random. We show that this algorithm is a  $\frac{1}{3}$ -approximation to our revenue function and further this is tight.

**Data:** Vertices  $V$ , weights  $w : E \rightarrow \mathbb{R}^{\geq 0}$   
Initialize clusters  $\mathcal{C} \leftarrow \{V\}$ ;  
**while** some cluster  $C \in \mathcal{C}$  has more than one vertex **do**  
    Let  $A, B$  be a uniformly random 2-partition of  $C$ ;  
    Set  $\mathcal{C} \leftarrow \mathcal{C} \cup \{A, B\} \setminus \{C\}$ ;  
**end**

**Algorithm 1:** Random Hierarchical Clustering

**Theorem 2.1.** Consider a graph  $G = (V, E)$  with nonnegative edge weights  $w : E \rightarrow \mathbb{R}^{\geq 0}$ . Let the hierarchical clustering  $T^*$  be a maximizer of  $\text{rev}_G(\cdot)$  and let  $T$  be the hierarchical clustering returned by Algorithm 1. Then:

$$\mathbb{E}[\text{rev}_G(T)] \geq \frac{1}{3} \text{rev}_G(T^*)$$

*Proof.* We begin by pretending that  $A$  or  $B$  empty is a valid partition of  $C$ , and address this detail at the end of the proof. If so, we can generate  $A, B$  with the following random process: for each vertex  $v \in C$ , flip a fair coin to decide if it goes into  $A$  or into  $B$ .

Now, consider an edge  $(i, j) \in E$ . The algorithm will score a revenue of  $w_{ij} |\text{nonleaves}(T[i \vee j])|$ . Thus, we need to determine the expected value of  $|\text{nonleaves}(T[i \vee j])|$ . How often does one of the  $n - 2$  other nodes besides  $i$  and  $j$  become a nonleaf of  $T[i \vee j]$ ? Fix all coin flips made for  $i$  and let  $k \neq i, j$  be a point. The point  $k$  will become a nonleaf if  $j$  matches more coin flips than  $k$  does. The number of matched coin flips is a geometric random variable with parameter  $1/2$ . There is a  $1/2$  chance of matching for zero coin flips, a  $1/4$  chance of matching for one coin flip, and so on. Hence the probability of equality is  $1/4 + 1/16 + 1/64 + \dots = 1/3$ . By symmetry, the remaining  $2/3$  probability is split between  $j$  matching for more and  $k$  matching for more. Hence each of the other  $n - 2$  nodes  $k$  has exactly a  $1/3$  chance of being a nonleaf. As a result,

$$\mathbb{E}[\text{rev}_G(T)] = \frac{n-2}{3} \sum_{ij} w_{ij} \geq \frac{1}{3} \text{rev}_G(T^*)$$

since it is impossible to have more than  $n - 2$  nonleaves.

Finally, we address the possibility of  $A$  or  $B$  being empty. This is equivalent to a node in  $T$  having a single child. In this case,  $\text{rev}_G(T)$  is unchanged if we merge the node with that child, since this does not change  $\text{leaves}(T[i \vee j])$  for any edge  $(i, j)$ . Hence if  $A$  or  $B$  is empty we can safely redraw. Hence our random process is equivalent to uniformly drawing over all partitions. This completes the proof.  $\square$

We now establish that this is tight.

**Lemma 2.2.** *There exists a graph  $G = (V, E)$  with nonnegative edge weights  $w : E \rightarrow \mathbb{R}^{\geq 0}$ , such that if the hierarchical clustering  $T^*$  is an optimal solution of  $\text{rev}_G(\cdot)$  and  $T$  is the hierarchical clustering returned by Algorithm 1,*

$$\mathbb{E}[\text{rev}_G(T)] = \frac{1}{3} \text{rev}_G(T^*)$$

*Proof.* In the proof of Lemma 2.1, we showed that

$$\mathbb{E}[\text{rev}_G(T)] = \frac{n-2}{3} \sum_{ij} w_{ij}.$$

This naturally suggests a tight example: any graph where the optimal hierarchical clustering  $T^*$  can capture all edges  $(i, j) \in E$  with non-zero weight using only clusters of size 2. In other words, in any graph where the edges form a matching, the bound is tight.  $\square$
